# Supplementary material
Source: PubMed Central journal article supplement (PMC4754787)
Supplement: NIHMS690111-supplement-1.pdf [file NIHMS690111-supplement-1.pdf]

## SUPPLEMENTARY INFORMATION

### SUPPLEMENTARY DISCUSSION

The compatibility of the donor and recipient immune systems plays an essential role in the success of haematopoietic stem and progenitor cell (HSPC) transplantation. Among all of the factors influencing the immune systems, genes from the human major histocompatibility complex (MHC) locus have been shown to be the most important genes determining tissue histocompatibility. When the adult zebrafish whole kidney marrow (WKM) competitive transplantation assay was developed and the chemical screening was performed, knowledge of zebrafish MHC was very preliminary. In addition, although wild-type zebrafish have been inbred for generations, unlike the BL6 mice, they still harbor diverse sets of MHC genotypes. This fact might have a substantial impact on the average survival and chimerism of transplanted zebrafish recipients in the adult zebrafish transplantation experiments performed in this study. In fact, on average we had about 50-70% of recipients surviving up to 4 wpt (week post transplant).

Even though the donors and recipients were not completely immune-matched, this does not compromise the reliability of evaluating the chemicals' effects on enhancing WKM engraftment for the following reasons: (1) The donor WKM cells were dissected from multiple donors and pooled together before being split into different chemical treatment groups. Therefore, each treatment group should receive cells with the same mixture of MHC genotypes; (2) In each chemical screen, more than 150 adult *casper* recipients were mixed, 10 of which were randomly assigned to each group. Therefore, the recipients' MHC genotypes were also randomly distributed among all the treatment groups; (3) All screen hits were repeated in at least two more experiments with different groups of donors and recipients, the MHC genotypes of which should be independent of the previous experiments.

The next step in improving the overall efficiency and reproducibility of the zebrafish WKM transplantation assay is to more comprehensively understand the zebrafish MHC system and try to match the donor and recipient immune systems. We have already started this initiative recently in our lab<sup>1</sup>. We think this will improve the survival rate and make the assay more suitable for evaluating long-term engraftment.

## **SUPPLEMENTARY VIDEOS**

**Video S1 & S2. Confocal time-lapse imaging of HSPC trafficking to and engrafting CHT (caudal haematopoietic tissue) in zebrafish embryos.**

*Tg(Runx1+23:GPF;flk1:DsRed2)* embryos were treated with chemicals between 24-46 hpf. Chemicals were washed off at 46 hpf. Embryos were immediately mounted in 1% low-melting-point agarose and imaged between 54-63 hpf. Time-lapse movies were taken on a spinning disk confocal microscope with a 28°C incubation chamber. Images were taken every 2 minutes and focused on the CHT region.

**Video S1: DMSO-treated embryo**

**Video S2: 5  $\mu$ M 11,12-EET-treated embryo**

## SUPPLEMENTARY TABLES

**Table S1: Chemicals used in the zebrafish embryo suppressor screen.**

| Chemical Names | Sources                      | Highest Doses ( $\mu$ M) | Target Pathways            |
|----------------|------------------------------|--------------------------|----------------------------|
| SB 203580      | Tocris                       | 100                      | p38                        |
| PD98059        | Calbiochem                   | 50                       | MEK1                       |
| U0126          | Tocris                       | 30                       | MEK1/2                     |
| GW5074         | Tocris                       | 50                       | C-RAF                      |
| LY294002       | Sigma                        | 10                       | PI3K                       |
| wortmannin     | Sigma                        | 1                        | PI3K AKT                   |
| PI-103         | Cayman                       | 10                       | PI3K                       |
| rapamycin      | Enzo                         | 400                      | mTOR                       |
| H89            | Sigma                        | 5                        | PKA                        |
| SQ22536        | Sigma                        | 200                      | Adenylate Cyclase          |
| GW9662         | Cayman                       | 5                        | PPAR $\gamma$ antagonist   |
| BADGE          | Tocris                       | 10                       | PPAR $\gamma$ antagonist   |
| Ciglitazone    | Enzo                         | 10                       | PPAR $\gamma$ agonist      |
| WY14643        | Tocris                       | 10                       | PPAR $\alpha$ agonist      |
| TPCA           | Sigma                        | 50                       | IKK                        |
| Bay 11-7082    | Cayman                       | 1                        | NF- $\kappa$ B             |
| PP2            | Sigma                        | 10                       | SRC                        |
| AG1478         | Sigma                        | 50                       | EGFR                       |
| GM6001         | Enzo                         | 25                       | MMP                        |
| SU 5402        | Tocris                       | 30                       | FGF/VEGF                   |
| Indomethacin   | Sigma                        | 20                       | COX                        |
| Dorsomorphin   | Tocris                       | 20                       | BMP                        |
| L-NAME         | Sigma                        | 10                       | NOS                        |
| SU1498         | EMD                          | 50                       | VEGF                       |
| Cyclopamine    | Sigma                        | 20                       | SHH                        |
| NSC 23766      | Tocris                       | 50                       | RAC                        |
| Compound W     | Tocris                       | 10                       | NOTCH                      |
| AS605240       | Sigma                        | 10                       | PI3K $\gamma$ <sup>2</sup> |
| PIK75          | Cayman                       | 3                        | PI3K $\alpha$              |
| TGX221         | Gift of Nathaniel Gray (HMS) | 20                       | PI3K $\beta$               |
| PIK-294        | Gift of Nathaniel Gray (HMS) | 30                       | PI3K $\delta$              |

**Table S2: Sequences of morpholinos (MO) used in zebrafish embryo studies.**

| MO Names                   | Target Ref Seq | MO Sequence               |
|----------------------------|----------------|---------------------------|
| * <i>junb</i> _ATG         | NM_213556      | CGGTTGCTCCATTTTTGTTGACATG |
| <i>c-jun</i> _ATG          | NM_199987      | TTCCATCTTGGTAGACATAGAAGGC |
| <i>c-jun</i> _5'UTR        | NM_199987      | GCGAAACTTTTAGTTCAGAAGCAGT |
| ** <i>gna12</i> _ATG       | NM_001013277   | CGCACCACGCCAGCCATCCTGTCCA |
| ** <i>gna13a</i> _ATG      | NM_001012243   | AAATCCGCCATCTTTGTAGTAGCGA |
| ** <i>gna13b</i> _ATG      | NM_001013263   | AGGAAATACGCCATCTTTGTGCAAC |
| <i>pik3ca1</i> _ATG        | XM_009306175.1 | GTCTTGGAGGCATGATTTGTAATCC |
| <i>pik3cb</i> _ATG         | XM_005157466.2 | GCATGGCAGAGAACACACTGAAGCC |
| ***MO2- <i>pik3cg</i> _ATG | NM_213306.1    | CATCATCACTGGCTTGCTGTTCCAT |
| <i>pik3cd</i> _ATG         | NM_201199.1    | GGCATCGTGCAGGAAACTCATCTAC |

\* The *junb*\_ATG morpholino is a published sequence<sup>3</sup>. But due to the high similarity of the first 23 bp coding sequences between *junb* and *junbl* (only differ by 4 bp, including a consecutive 3 bp), this morpholino might potentially knock down both alleles at the same time.

\*\* Published morpholino sequences<sup>4</sup>.

\*\*\* Published morpholino sequence<sup>5</sup>.

**Table S3: Microarray analysis of 36 hpf wild-type zebrafish embryos treated with DMSO or 5  $\mu$ M 11,12-EET between 24-36 hpf. (See the separate Excel sheet, Supplementary Table S3)**

Total RNA was extracted from 36 hpf zebrafish embryos treated with DMSO or 5  $\mu$ M 11,12-EET between 24-36 hpf, with 3 biological replicates each and n=25 in each group. Microarray hybridization was performed with the Affymetrix GeneChip Zebrafish Genome Array. Genes with  $q < 0.1$  by SNR test were considered differentially expressed.

**Table S4: RNA-seq analysis of human umbilical cord blood CD34+ HSPCs and the human myeloid cell line U937 with DMSO or 5  $\mu$ M 11,12-EET for 2 hrs. (See separate Excel sheets, Supplementary Table S4).**

- Sheet 1 lists genes upregulated in CD34+ HSPCs with  $\log_2fc > 0.5$  ( $\log_2$  fold change).
- Sheet 2 lists genes downregulated in CD34+ HSPCs with  $\log_2fc < -0.5$ .
- Sheet 3 lists genes upregulated in U937 with  $\log_2fc > 0.5$ .
- Sheet 4 lists genes downregulated in U937 with  $\log_2fc < -0.5$ .
- Sheet 5 lists the overlapping genes upregulated in CD34+ HSPCs and U937.
- Sheet 6 lists all increased or decreased bio-functions, predicted by IPA based on the overlapping gene set. Labeled in orange are bio-functions summarized under the categories “Cell-to-cell interaction” and “Cellular movement” with significant p values and an activation z-score  $> 2$ , accounting for the top bio-functions on the list.

**Table S5: Comparison of major haematopoietic phenotypes and signaling pathways regulated by PGE2 and EETs.**

|                                              | PGE2                                                      | EETs                                                                                 |
|----------------------------------------------|-----------------------------------------------------------|--------------------------------------------------------------------------------------|
| Zebrafish embryo treatment between 24-36 hpf | Increase HSPCs in AGM<br>Increase HSPCs in CHT            | Increase HSPCs in AGM<br>Increase HSPCs in CHT                                       |
| Zebrafish embryo treatment after 40 hpf      | Decrease HSPCs in CHT and increase HSPCs retained in AGM* | Increase <i>cmyb</i> + progenitors in CHT, but not <i>Runx1+23:GFP</i> HSCs          |
| Adult marrow engraftment 2-6 hr treatment    | Increase engraftment                                      | Increase engraftment                                                                 |
| Downstream signaling pathway                 | Sensitive to $G\alpha_s$ inhibition                       | Insensitive to $G\alpha_s$ inhibition, but sensitive to $G\alpha_{12/13}$ inhibition |

\* Unpublished data, personal communication with Trista E. North and Owen J. Tamplin.

## References

- 1 de Jong, J. L. & Zon, L. I. Histocompatibility and hematopoietic transplantation in the zebrafish. *Advances in hematology* **2012**, 282318, doi:10.1155/2012/282318 (2012).
- 2 Camps, M. *et al.* Blockade of PI3Kgamma suppresses joint inflammation and damage in mouse models of rheumatoid arthritis. *Nat Med* **11**, 936-943, doi:10.1038/nm1284 (2005).
- 3 Meder, B. *et al.* JunB-CBFbeta signaling is essential to maintain sarcomeric Z-disc structure and when defective leads to heart failure. *J Cell Sci* **123**, 2613-2620, doi:10.1242/jcs.067967 (2010).
- 4 Lin, F. *et al.* Essential roles of G{alpha}12/13 signaling in distinct cell behaviors driving zebrafish convergence and extension gastrulation movements. *J Cell Biol* **169**, 777-787, doi:10.1083/jcb.200501104 (2005).
- 5 Yoo, S. K. *et al.* Differential regulation of protrusion and polarity by PI3K during neutrophil motility in live zebrafish. *Dev Cell* **18**, 226-236, doi:10.1016/j.devcel.2009.11.015 (2010).
